# Supplementary material for: Pharmacists’ Perceptions and Drivers of Immunization Practices for COVID-19 Vaccines: Results of a Nationwide Survey Prior to COVID-19 Vaccine Emergency Use Authorization
Source: MDPI journal article supplement (doi:10.3390/pharmacy9030131), 2021-07-26
Supplement: s1 [file s1]

## Supplementary Appendix

**Table S1: Survey Questionnaire**

| Demographic Survey Questionnaire |                                                                                           |                                                                                                                                                                                                                                                                                                                                                                                                             |
|----------------------------------|-------------------------------------------------------------------------------------------|-------------------------------------------------------------------------------------------------------------------------------------------------------------------------------------------------------------------------------------------------------------------------------------------------------------------------------------------------------------------------------------------------------------|
| Category                         | Idea Behind Question                                                                      | Framed Question                                                                                                                                                                                                                                                                                                                                                                                             |
| Consent                          | Consent form                                                                              | <p><b>Question 1: If answer is (2) - participant will be unable to complete survey</b><br/> By beginning this research, I acknowledge that I am 18 years of age or older and have read and understand the information. I agree to take part in the research, with the knowledge that I am free to withdraw my participation in the research without penalty.</p> <p>(1) I Agree<br/> (2) I Do Not Agree</p> |
| Inclusion Criteria               | Inclusion criteria                                                                        | <p><b>Question 2: If answer is (1) - participant directed to question 3. If answer is (2) - participant will be unable to complete survey</b><br/> Are you currently a licensed or practicing pharmacist in the United States?</p> <p>(1) Yes<br/> (2) No</p>                                                                                                                                               |
|                                  |                                                                                           | <p><b>Question 3:</b><br/> What state within the U.S. do you practice pharmacy in? <b>If participants answered “I do not reside in the United States,” they were unable to complete survey</b></p> <p>(Drop down with all 50 states, District of Columbia, Puerto Rico, and “I do not reside in the United States”)</p>                                                                                     |
| Personal history                 | Gender/Sex                                                                                | <p><b>Question 4:</b><br/> Which gender do you currently identify as?</p> <p>(1) Male<br/> (2) Female<br/> (3) Transgender man/female-to-male<br/> (4) Transgender woman/ male-to-female<br/> (5) Non-binary, genderqueer, or gender nonconforming<br/> (6) Other (specify) _____<br/> (7) Prefer not to answer</p>                                                                                         |
|                                  | Age                                                                                       | <p><b>Question 5 :</b><br/> What is your age?<br/> (Free text – numerical values only)</p>                                                                                                                                                                                                                                                                                                                  |
|                                  | Race/Ethnicity                                                                            | <p><b>Question 6:</b><br/> Which of the following categories describes your race?</p> <p>(1) White<br/> (2) Black<br/> (3) Hispanic or Latinx<br/> (4) American Indian<br/> (5) Alaska Native<br/> (6) Asian<br/> (7) Native Hawaiian<br/> (8) Pacific Islander<br/> (9) Other (specify)<br/> (10) Don't know<br/> (11) Prefer not to answer</p>                                                            |
|                                  | Are they considered at increased risk of severe illness from COVID-19 (According to CDC)? | <p><b>Question 7:</b><br/> Which, if any, of the following medical conditions do you have? <i>(Please select all that apply)</i></p> <p>1) Cancer</p>                                                                                                                                                                                                                                                       |

|                   |                        |                                                                                                                                                                                                                                                                                                                                                                                                                                                                                                                                                                                                                                                                                                                                                                      |
|-------------------|------------------------|----------------------------------------------------------------------------------------------------------------------------------------------------------------------------------------------------------------------------------------------------------------------------------------------------------------------------------------------------------------------------------------------------------------------------------------------------------------------------------------------------------------------------------------------------------------------------------------------------------------------------------------------------------------------------------------------------------------------------------------------------------------------|
|                   |                        | 2) Chronic kidney disease<br>3) Chronic obstructive pulmonary disease<br>4) Immunocompromised state from solid organ transplant<br>5) Obesity (BMI $\geq 30$ )<br>6) Serious heart condition, such as heart failure, coronary artery disease, or cardiomyopathies<br>7) Sickle cell disease<br>8) Type 2 diabetes mellitus<br>9) Asthma (moderate to severe)<br>10) Cerebrovascular disease<br>11) Cystic fibrosis<br>12) Immunocompromised state from bone marrow transplant, immune deficiencies, HIV, use of corticosteroids or other immune weakening medicines<br>13) Neurologic conditions, such as dementia<br>14) Liver disease<br>15) Pregnancy<br>16) Pulmonary fibrosis<br>17) Smoking<br>18) Thalassemia<br>19) Type 1 diabetes<br>20) None of the above |
| Pharmacy Practice | Years of practice      | <b>Question 8:</b><br><b>How many years have you been a practicing pharmacist?</b><br>(Free text – numerical values only)                                                                                                                                                                                                                                                                                                                                                                                                                                                                                                                                                                                                                                            |
|                   | Pharmacy practice      | <b>Question 9:</b><br><b>What pharmacy setting do you <u>primarily</u> work in?</b><br>(1) Hospital pharmacy<br>(2) Outpatient clinic<br>(3) Community pharmacy<br>(4) Pharmaceutical industry<br>(5) Managed care<br>(6) Academia<br>(7) Other _____<br><br><b>Question 10:</b><br><b>Do you work in a specialized therapeutic area? If so, what is it?</b><br>(1) Ambulatory care<br>(2) Infectious Disease/HIV<br>(3) Transplant<br>(4) Oncology<br>(5) Neurology<br>(6) Anticoagulation/Cardiology<br>(7) Critical Care<br>(8) Emergency Medicine<br>(9) Pediatrics<br>(10) Geriatrics<br>(11) Internal medicine<br>(12) Other _____<br>(13) Not applicable                                                                                                      |
|                   | Post-doctoral training | <b>Question 11: <i>If answered (1), (2), (3) are selected proceed to question 12. If answered (4), skip to question 13.</i></b><br><b>Which if the following post-doctoral training, if any, have you completed or are working on completing?</b><br>(1) Residency<br>(2) Fellowship<br>(3) Both residency and fellowship<br>(4) None<br><b>Question 12:</b>                                                                                                                                                                                                                                                                                                                                                                                                         |

|                                                                                                  |                                                                                                                                                                                                                                                                                                                                                                                                                                                                                                                                                                                                                                                                                                                                                                                                         |                                                                                                                                                                                                                                                                                                                                                                                                                                                                                                                                                                                                                                                                                                                                                                                                                                                                                                                                                                                                                                                                               |
|--------------------------------------------------------------------------------------------------|---------------------------------------------------------------------------------------------------------------------------------------------------------------------------------------------------------------------------------------------------------------------------------------------------------------------------------------------------------------------------------------------------------------------------------------------------------------------------------------------------------------------------------------------------------------------------------------------------------------------------------------------------------------------------------------------------------------------------------------------------------------------------------------------------------|-------------------------------------------------------------------------------------------------------------------------------------------------------------------------------------------------------------------------------------------------------------------------------------------------------------------------------------------------------------------------------------------------------------------------------------------------------------------------------------------------------------------------------------------------------------------------------------------------------------------------------------------------------------------------------------------------------------------------------------------------------------------------------------------------------------------------------------------------------------------------------------------------------------------------------------------------------------------------------------------------------------------------------------------------------------------------------|
|                                                                                                  |                                                                                                                                                                                                                                                                                                                                                                                                                                                                                                                                                                                                                                                                                                                                                                                                         | <p><b>If a postdoctoral training was complete, what was it completed in?</b></p> <p>(1) Ambulatory care<br/> (2) Infectious Disease/HIV<br/> (3) Transplant<br/> (4) Oncology<br/> (5) Neurology<br/> (6) Anticoagulation/Cardiology<br/> (7) Critical Care<br/> (8) Emergency Medicine<br/> (9) Pediatrics<br/> (10) Geriatrics<br/> (11) Internal medicine<br/> (12) Other _____</p>                                                                                                                                                                                                                                                                                                                                                                                                                                                                                                                                                                                                                                                                                        |
| <p><b>Comfortability/<br/>Knowledge of<br/>COVID-19<br/>/Perceived risk<br/>and severity</b></p> | <p>Adapted from CDC National Immunization Survey: 2009 H1N1 Knowledge, attitudes, practice-<br/> Question 13: Perceived risk (susceptibility)</p> <p>Does someone who has personally had COVID-19 feel that they are already protected and therefore do not need the vaccine?</p> <p>Adapted from H1N1 Alkuwari et. al Qatar survey study<br/> Question 15: Does the pharmacist perceive COVID-19 as a severe/serious disease that can impact their daily life.</p> <p>Question 16: Influenza study by Petek et. al showed that familiarity with influenza disease did not impact the decision to vaccinate for influenza - will the same hold true for COVID-19? Rapidly changing knowledge of the virus/disease state, will this influence the pharmacist's view of credibility of a new vaccine?</p> | <p><b>Please respond with how much you agree with the following statements.</b></p> <p><b>Question 13: <i>If (1) is selected, skip to question 16. If (2) is selected proceed to question 14.</i></b><br/> <b>Have you had a confirmed diagnosis of COVID-19?</b><br/> (1) Yes<br/> (2) No</p> <p><b>Please respond with how much you agree with the following statements.</b></p> <p><b>Question 14:</b><br/> <b>I am concerned about becoming infected with SARS-CoV-2.</b><br/> (1) Strongly disagree<br/> (2) Disagree<br/> (3) Neutral/Don't know<br/> (4) Agree<br/> (5) Strongly agree</p> <p><b>Question 15:</b><br/> <b>My daily work will be affected if I get COVID-19.</b><br/> (1) Strongly disagree<br/> (2) Disagree<br/> (3) Neutral/Don't know<br/> (4) Agree<br/> (5) Strongly agree</p> <p><b>Question 16:</b><br/> <b>I have been following the news and scientific literature regarding current COVID-19 vaccine trials.</b><br/> (1) Strongly disagree<br/> (2) Disagree<br/> (3) Neither agree nor disagree<br/> (4) Agree<br/> (5) Strongly agree</p> |

|                                                 |                                                                                                                                                                                                                                                                                                                                                                                                                                                                                                                                                                                                                                                                             |                                                                                                                                                                                                                                                                                                                                                                                                                                                                                                                                                                                                                                                   |
|-------------------------------------------------|-----------------------------------------------------------------------------------------------------------------------------------------------------------------------------------------------------------------------------------------------------------------------------------------------------------------------------------------------------------------------------------------------------------------------------------------------------------------------------------------------------------------------------------------------------------------------------------------------------------------------------------------------------------------------------|---------------------------------------------------------------------------------------------------------------------------------------------------------------------------------------------------------------------------------------------------------------------------------------------------------------------------------------------------------------------------------------------------------------------------------------------------------------------------------------------------------------------------------------------------------------------------------------------------------------------------------------------------|
|                                                 | <p>Based on a statement from the WHO<br/>That says COVID-19 pandemic is a wave, not seasonal (Released July 28th, 2020)</p> <p>Do pharmacists believe that COVID-19 is a temporary/seasonal problem or do they believe it is wave that can be controlled by human action - will this belief impact them to get the vaccine?</p> <p><a href="https://www.reuters.com/article/us-health-coronavirus-who/who-says-covid-19-pandemic-is-one-big-wave-not-seasonal-idUSKCN24T16U">https://www.reuters.com/article/us-health-coronavirus-who/who-says-covid-19-pandemic-is-one-big-wave-not-seasonal-idUSKCN24T16U</a></p>                                                        | <p><b>Question 17:</b><br/><b>I believe COVID-19 will be a seasonal virus.</b></p> <p>(1) Strongly disagree<br/>(2) Disagree<br/>(3) Neutral/Don't know<br/>(4) Agree<br/>(5) Strongly agree</p> <p><b>Question 18:</b><br/><b>COVID-19 can occur in any season and is dependent on human control to slow the spread.</b></p> <p>(1) Strongly disagree<br/>(2) Disagree<br/>(3) Neutral/Don't know<br/>(4) Agree<br/>(5) Strongly agree</p>                                                                                                                                                                                                       |
| <p><b>Personal Experience with COVID-19</b></p> | <p>To see if pharmacist who care for COVID-19 vaccine patients are more or less likely to get the vaccine (include community pharmacy with covid-19 testing sites, clinical settings)</p> <p>CDC Interim Guidance for Critical Workers Who Have Had Exposure<br/><a href="https://www.cdc.gov/coronavirus/2019-ncov/community/critical-workers/implementing-safety-practices.html">https://www.cdc.gov/coronavirus/2019-ncov/community/critical-workers/implementing-safety-practices.html</a></p> <p><a href="https://www.cdc.gov/coronavirus/2019-ncov/if-you-are-sick/quarantine.html">https://www.cdc.gov/coronavirus/2019-ncov/if-you-are-sick/quarantine.html</a></p> | <p><b>Question 19:</b><br/><b>Have you worked in close contact or cared for a person who had COVID-19?</b></p> <p>(1) Yes<br/>(2) No<br/>(3) Unsure</p> <p><b>Question 20:</b><br/><b>The CDC defines COVID-19 exposure as having EITHER of the following</b></p> <ul style="list-style-type: none"> <li>• Close contact within 6 feet for 15 minutes of an individual with confirmed or suspected COVID-19</li> <li>• Close contact with the individual 48 hours prior to them becoming symptomatic</li> </ul> <p><b>Based on this definition, have you been exposed to a person with COVID-19?</b></p> <p>(1) Yes<br/>(2) No<br/>(3) Unsure</p> |
|                                                 | <p>To gauge the impact of a personal loss on someone's willingness</p>                                                                                                                                                                                                                                                                                                                                                                                                                                                                                                                                                                                                      | <p><b>Question 21:</b><br/><b>Has a loved one fallen critically ill or passed away due to COVID-19?</b></p> <p>(1) Yes<br/>(2) No</p>                                                                                                                                                                                                                                                                                                                                                                                                                                                                                                             |

| Category                                                                                                                                                                  | Idea behind the question                                                                                                                                                                                                                                                                                                                                                                                        | Framed Question                                                                                                                                                                                                                                                                                                                                                                                                                                                                                                                                                                                                                                                                                                                                                                                                                                                                                                                                                                                                                                                                                                                                                                                                                                                                                                                                                                                                                                                                                                                                                                                                                                                                                                                                                                                                                                                                                                                                                                                                                                                                                                                                                                                                                                                                                                                                                                                                                                                                                                                                                                                                               |
|---------------------------------------------------------------------------------------------------------------------------------------------------------------------------|-----------------------------------------------------------------------------------------------------------------------------------------------------------------------------------------------------------------------------------------------------------------------------------------------------------------------------------------------------------------------------------------------------------------|-------------------------------------------------------------------------------------------------------------------------------------------------------------------------------------------------------------------------------------------------------------------------------------------------------------------------------------------------------------------------------------------------------------------------------------------------------------------------------------------------------------------------------------------------------------------------------------------------------------------------------------------------------------------------------------------------------------------------------------------------------------------------------------------------------------------------------------------------------------------------------------------------------------------------------------------------------------------------------------------------------------------------------------------------------------------------------------------------------------------------------------------------------------------------------------------------------------------------------------------------------------------------------------------------------------------------------------------------------------------------------------------------------------------------------------------------------------------------------------------------------------------------------------------------------------------------------------------------------------------------------------------------------------------------------------------------------------------------------------------------------------------------------------------------------------------------------------------------------------------------------------------------------------------------------------------------------------------------------------------------------------------------------------------------------------------------------------------------------------------------------------------------------------------------------------------------------------------------------------------------------------------------------------------------------------------------------------------------------------------------------------------------------------------------------------------------------------------------------------------------------------------------------------------------------------------------------------------------------------------------------|
| <b>Decisions to receive and recommend</b><br><br><i>Includes</i><br><br><i>Time from approval to vaccination</i><br><br>+<br><i>Barriers/Reasons to receive/recommend</i> | <b><u>Willingness to Receive</u></b><br><br>Question 22:<br>Are pharmacist likely to receive the vaccine $\leq 1$ year since approval<br><br>Question 23:<br>Are pharmacists likely to receive a vaccine $>1$ year from approval?<br><br>Adapted from CDC National Immunization Survey: 2009 H1N1 Knowledge, attitudes, practice<br><br>Question 24: Barriers to receive<br><br>Question 25: Reasons to receive | <b>Question 22:</b><br><b>If a COVID-19 vaccine was deemed safe and effective by the FDA, how likely would you be to <u>get vaccinated</u> LESS THAN OR EQUAL to 1 year from the time of vaccine approval?</b><br>(1) Extremely unlikely<br>(2) Somewhat unlikely<br>(3) Neither likely nor unlikely<br>(4) Somewhat likely<br>(5) Extremely likely<br><br><b>Question 23:</b><br><b>If a COVID-19 vaccine was deemed safe and effective by the FDA, how likely would you be to <u>get vaccinated</u> GREATER THAN 1 year after vaccine approval?</b><br>(1) Extremely unlikely<br>(2) Somewhat unlikely<br>(3) Neither likely nor unlikely<br>(4) Somewhat likely<br>(5) Extremely likely<br><br><b>Question 24:</b> <i>Question will only appear to those who answer "extremely unlikely", "somewhat unlikely", "neither likely nor unlikely" to <b>Question 22 OR 23</b> (revolved around decision about <u>getting</u> vaccinated regardless of time frame of vaccine approval).</i><br><br><b>Which of the following would be the reason for your decision to delay or refuse the vaccine for yourself? Please select all that apply.</b><br>(1) Concerns about side effects or sickness<br>(2) Think the vaccine does not work<br>(3) Vaccination is not needed or not wanted<br>(4) Because I already had COVID-19<br>(5) Not in a high-risk or priority group<br>(6) Limited contact with high risk patients<br>(7) COVID-19 is a non-severe or temporary issue<br>(8) Rapidly changing real world data during pandemic<br>(9) The ability to social distance and wear a mask provides sufficient protection<br>(10) Other _____<br><br><b>Question 25:</b> <i>Question will only appear for those who are "somewhat likely," or "extremely likely," to get vaccinated in <b>Questions 22 OR 23</b> (revolved around decision about <u>getting</u> vaccinated regardless of timeframe of vaccine approval)</i><br><br><b>If you were to <u>receive</u> the COVID-19 vaccine for <u>yourself</u>, which of the following would be reasons for your decision? Please select all that apply.</b><br>(1) Wish to protect self<br>(2) Being a healthcare worker<br>(3) Avoid transmitting COVID-19 to my family<br>(4) Avoid transmitting COVID-19 to my patients<br>(5) Workplace mandate<br>(6) Have a medical condition that puts me at increased risk for COVID-19<br>(7) Recommendations of other medical professionals<br>(8) Recommendations of friends and family<br>(9) Recommendations of government health agencies (CDC, FDA, NIH, IDSA etc.)<br>(10) Recommendations of political leaders<br>(11) Other _____ |

|  |                                                                                                                                                                                                                                                                                                                                                                                                                                                              |                                                                                                                                                                                                                                                                                                                                                                                                                                                                                                                                                                                                                                                                                                                                                                                                                                                                                                                                                                                                                                                                                                                                                                                                                                                                                                                                                                                                                                                                                                                                                                                                                                                                                                                                                                                                                                                                                                                                                                                                                                                                                                                                                                                                                                                                                                                                                                                                                                                                                                                                                                                                                                                                                                                                                                                                                                                                                                                                                                                                                           |
|--|--------------------------------------------------------------------------------------------------------------------------------------------------------------------------------------------------------------------------------------------------------------------------------------------------------------------------------------------------------------------------------------------------------------------------------------------------------------|---------------------------------------------------------------------------------------------------------------------------------------------------------------------------------------------------------------------------------------------------------------------------------------------------------------------------------------------------------------------------------------------------------------------------------------------------------------------------------------------------------------------------------------------------------------------------------------------------------------------------------------------------------------------------------------------------------------------------------------------------------------------------------------------------------------------------------------------------------------------------------------------------------------------------------------------------------------------------------------------------------------------------------------------------------------------------------------------------------------------------------------------------------------------------------------------------------------------------------------------------------------------------------------------------------------------------------------------------------------------------------------------------------------------------------------------------------------------------------------------------------------------------------------------------------------------------------------------------------------------------------------------------------------------------------------------------------------------------------------------------------------------------------------------------------------------------------------------------------------------------------------------------------------------------------------------------------------------------------------------------------------------------------------------------------------------------------------------------------------------------------------------------------------------------------------------------------------------------------------------------------------------------------------------------------------------------------------------------------------------------------------------------------------------------------------------------------------------------------------------------------------------------------------------------------------------------------------------------------------------------------------------------------------------------------------------------------------------------------------------------------------------------------------------------------------------------------------------------------------------------------------------------------------------------------------------------------------------------------------------------------------------------|
|  | <p><b><u>Willingness to Recommend</u></b></p> <p>Question 26:<br/>Are pharmacist likely to recommend the vaccine <math>\leq</math> 1 year since approval</p> <p>Adapted from CDC National Immunization Survey: 2009 H1N1 Knowledge, attitudes, practice</p> <p>Question 27<br/>Are pharmacist likely to recommend the vaccine<br/>&gt; 1 year since approval:</p> <p>Question 28:<br/>Barriers to recommend</p> <p>Question 29:<br/>Reasons to recommend</p> | <p><b>Question 26:</b><br/><b>If a COVID-19 vaccine was deemed safe and effective by the FDA, how likely are you to <u>recommend</u> the COVID-19 vaccine to patients LESS THAN OR EQUAL 1 year from the time of vaccine approval?</b></p> <ol style="list-style-type: none"> <li>(1) Extremely unlikely</li> <li>(2) Somewhat unlikely</li> <li>(3) Neither likely nor unlikely</li> <li>(4) Somewhat likely</li> <li>(5) Extremely likely</li> </ol> <p><b>Question 27:</b><br/><b>If a COVID-19 vaccine was deemed safe and effective by the FDA, how likely are you to <u>recommend</u> the COVID-19 vaccine to your patients GREATER THAN 1 year after vaccine approval?</b></p> <ol style="list-style-type: none"> <li>(1) Extremely unlikely</li> <li>(2) Somewhat unlikely</li> <li>(3) Neither likely nor unlikely</li> <li>(4) Somewhat likely</li> <li>(5) Extremely likely</li> </ol> <p><b>Question 28:</b> <i>Question will only appear to those who answer “extremely unlikely”, “somewhat unlikely”, “neither likely nor unlikely” to <b>Question 26 OR 27</b> (revolved around decision about <u>recommending</u> vaccine regardless of time frame of vaccine approval).</i></p> <p><b>If you delay or refuse to <u>recommend</u> the COVID-19 vaccine for your patient, which of the following would be the reasons for your decision? Please select all that apply.</b></p> <ol style="list-style-type: none"> <li>(1) I have concerns about side effects or sickness</li> <li>(2) I believe the vaccine does not work</li> <li>(3) I am hesitant about vaccine discussion with patients</li> <li>(4) Patient already had COVID-19</li> <li>(5) Patient is not in a high-risk or a priority group</li> <li>(6) Patient has limited contact with high-risk population</li> <li>(7) I believe COVID-19 is a non-severe or temporary issue</li> <li>(8) Rapidly changing real world data during pandemic</li> <li>(9) I believe the ability to social distance and wear a mask provides sufficient protection</li> <li>(10) Other _____</li> </ol> <p><b>Question 29:</b> <i>Question will only appear for those who are “somewhat likely,” or “extremely likely,” to get vaccinated in <b>Questions 26 OR 27</b> (revolved around decision about <u>recommending</u> vaccine regardless of timeframe of vaccine approval)</i></p> <p><b>If you were to <u>recommend</u> the COVID-19 vaccine for your patients, which of the following would be reasons for your decision? Please select all that apply.</b></p> <ol style="list-style-type: none"> <li>(1) Reduce the risk of contracting COVID-19</li> <li>(2) Avoid transmitting COVID-19 to the patients’ family</li> <li>(3) Avoid transmitting COVID-19 to the community</li> <li>(4) Target patients that are at a higher risk for COVID-19 according to CDC criteria</li> <li>(5) Recommendations of government health agencies (CDC, FDA, NIH, IDSA etc.)</li> <li>(6) Recommendations of political leaders</li> <li>(7) Other _____</li> </ol> |
|  | General                                                                                                                                                                                                                                                                                                                                                                                                                                                      | Please answer Questions 30-33 with the assumption that a COVID-19 vaccine                                                                                                                                                                                                                                                                                                                                                                                                                                                                                                                                                                                                                                                                                                                                                                                                                                                                                                                                                                                                                                                                                                                                                                                                                                                                                                                                                                                                                                                                                                                                                                                                                                                                                                                                                                                                                                                                                                                                                                                                                                                                                                                                                                                                                                                                                                                                                                                                                                                                                                                                                                                                                                                                                                                                                                                                                                                                                                                                                 |

|                                              |                                                                                                                                                                                                                                                                                        |                                                                                                                                                                                                                                                                                                                                                                                                                                                                                                                                                                                                                                                                                                                                                                                                                                                                                                                                                                                                                                                                                                                                                                                                                                                                                                                                                                                                                                                                        |
|----------------------------------------------|----------------------------------------------------------------------------------------------------------------------------------------------------------------------------------------------------------------------------------------------------------------------------------------|------------------------------------------------------------------------------------------------------------------------------------------------------------------------------------------------------------------------------------------------------------------------------------------------------------------------------------------------------------------------------------------------------------------------------------------------------------------------------------------------------------------------------------------------------------------------------------------------------------------------------------------------------------------------------------------------------------------------------------------------------------------------------------------------------------------------------------------------------------------------------------------------------------------------------------------------------------------------------------------------------------------------------------------------------------------------------------------------------------------------------------------------------------------------------------------------------------------------------------------------------------------------------------------------------------------------------------------------------------------------------------------------------------------------------------------------------------------------|
| <b>Vaccine-specific Clinical information</b> | <p>Perceived barriers to COVID-19 vaccine</p> <p>Adapted from H1N1 Alkuwari et. al Qatar survey study</p>                                                                                                                                                                              | <p><b>had just been approved and deemed safe and effective by the FDA. Please answer with how strongly you agree or disagree with the following statements.</b></p> <p><b>Question 30:</b><br/> <b>I would feel protected if I received COVID-19 vaccination</b></p> <ol style="list-style-type: none"> <li>(1) Strongly disagree</li> <li>(2) Disagree</li> <li>(3) Neutral</li> <li>(4) Agree</li> <li>(5) Strongly Agree</li> </ol> <p><b>Question 31:</b><br/> <b>I would fear for serious side effects from the COVID-19 vaccine</b></p> <ol style="list-style-type: none"> <li>(1) Strongly disagree</li> <li>(2) Disagree</li> <li>(3) Neutral</li> <li>(4) Agree</li> <li>(5) Strongly agree</li> </ol> <p><b>Question 32:</b><br/> <b>I would doubt or be suspicious about the efficacy of a new COVID-19 vaccine</b></p> <ol style="list-style-type: none"> <li>(1) Strongly disagree</li> <li>(2) Disagree</li> <li>(3) Neutral</li> <li>(4) Agree</li> <li>(5) Strongly agree</li> </ol> <p><b>Question 33:</b><br/> <b>I would worry that the FDA overestimated the safety of the COVID-19 vaccine</b></p> <ol style="list-style-type: none"> <li>(1) Strongly disagree</li> <li>(2) Disagree</li> <li>(3) Neutral</li> <li>(4) Agree</li> <li>(5) Strongly agree</li> </ol>                                                                                                                                                                              |
|                                              | <p>To gauge what clinical information within the package insert and phase 1/phase 3 clinical studies of a vaccine a pharmacist will prioritize when evaluating a new vaccine</p> <p>This focuses on what clinical data pharmacist will prioritize in their vaccine decision-making</p> | <p><b>Question 34:</b><br/> <b>When asked to make a clinical decision to <u>RECIEVE</u> a new COVID-19 vaccine for <u>YOURSELF</u>, which of the following would you prioritize. Please select your <u>top 3 choices</u>.</b></p> <ol style="list-style-type: none"> <li>(1) Indication &amp; dosing schedule</li> <li>(2) Level of antibody titers produced</li> <li>(3) Reduced disease severity and/or transmissibility</li> <li>(4) Mortality reduced</li> <li>(5) Length of protection</li> <li>(6) Percentage of mild side effects</li> <li>(7) Percentage of Grade 2/3/4 side effects</li> <li>(8) Number of participants included in phase 3/4 clinical trials</li> <li>(9) Warnings, Precautions, and contraindications</li> <li>(10) Use in special populations</li> <li>(11) Clinical pharmacology (Mechanism of action)</li> <li>(12) How the vaccine is supplied, stored, and handled</li> <li>(13) Implementation and deployment strategy for mass immunization effort</li> <li>(14) The respective pharmaceutical company's reputation in vaccine development</li> </ol> <p><b>Question 35:</b><br/> <b>When asked to make a clinical decision to <u>RECOMMEND</u> a new COVID-19 vaccine for your <u>PATIENTS</u>, which of the following would you prioritize. Please select your <u>top 3 choices</u>.</b></p> <ol style="list-style-type: none"> <li>(1) Indication &amp; dosing schedule</li> <li>(2) Level of antibody titers produced</li> </ol> |

|  |  |                                                                                                                                                                                                                                                                                                                                                                                                                                                                                                                                                                                                                                                                                                                                  |
|--|--|----------------------------------------------------------------------------------------------------------------------------------------------------------------------------------------------------------------------------------------------------------------------------------------------------------------------------------------------------------------------------------------------------------------------------------------------------------------------------------------------------------------------------------------------------------------------------------------------------------------------------------------------------------------------------------------------------------------------------------|
|  |  | <ul style="list-style-type: none"> <li>(3) Reduced disease severity and/or transmissibility</li> <li>(4) Mortality reduced</li> <li>(5) Length of protection</li> <li>(6) Percentage of mild side effects</li> <li>(7) Percentage of Grade 2/3/4 side effects</li> <li>(8) Number of participants included in phase 3/4 clinical trials</li> <li>(9) Warnings, Precautions, and contraindications</li> <li>(10) Use in special populations</li> <li>(11) Mechanism of action</li> <li>(12) How the vaccine is supplied, stored, and handled</li> <li>(13) Implementation and deployment strategy for mass immunization effort</li> <li>(14) The respective pharmaceutical company's reputation in vaccine development</li> </ul> |
|--|--|----------------------------------------------------------------------------------------------------------------------------------------------------------------------------------------------------------------------------------------------------------------------------------------------------------------------------------------------------------------------------------------------------------------------------------------------------------------------------------------------------------------------------------------------------------------------------------------------------------------------------------------------------------------------------------------------------------------------------------|
